# Supplementary material for: High thermoelectric performance of higher manganese silicides prepared by ultra-fast thermal explosion
Source: Royal Society of Chemistry journal article supplement (doi:10.1039/c5tc02837j), 2015-01-01
Supplement: c5tc02837j1.pdf [file c5tc02837j1.pdf]

## Electronic Supplementary Information

Xiaoyu She,<sup>a</sup> Xianli Su,<sup>\*a</sup> Huizhen Du,<sup>a</sup> Tao Liang,<sup>a</sup> Gang Zheng,<sup>a</sup> Yonggao Yan,<sup>a</sup>

Rizwan Akram,<sup>a</sup> Xinfeng Tang,<sup>\*a</sup> Ctirad Uher<sup>b</sup>

a. State Key Laboratory of Advanced Technology for Materials Synthesis and Processing, Wuhan University of Technology, Wuhan 430070, China. Email:

[suxianli@whut.edu.cn](mailto:suxianli@whut.edu.cn)(X.Su), [tangxf@whut.edu.cn](mailto:tangxf@whut.edu.cn)(X.Tang)

b. Department of Physics, University of Michigan, Ann Arbor, MI 48109, USA

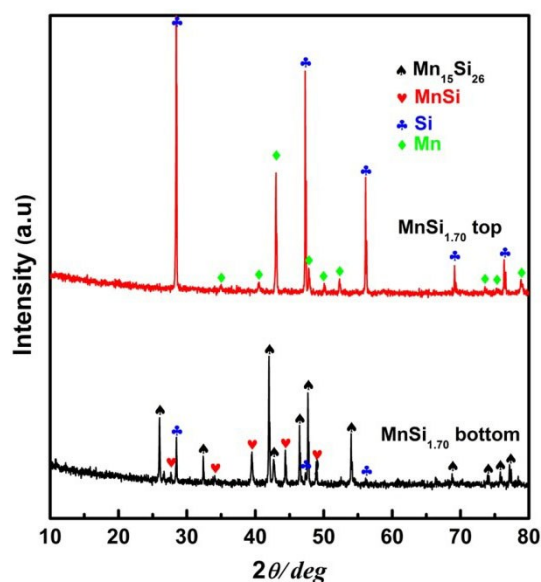

**Figure S1:** XRD pattern of bottom part and the top part of the  $\text{MnSi}_{1.70}$  pellet.
